# Supplementary material for: A comparative analysis of the complete chloroplast genomes of three Chrysanthemum boreale strains
Source: PeerJ journal article supplement (doi:10.7717/peerj.9448), 2020-07-03

(A)

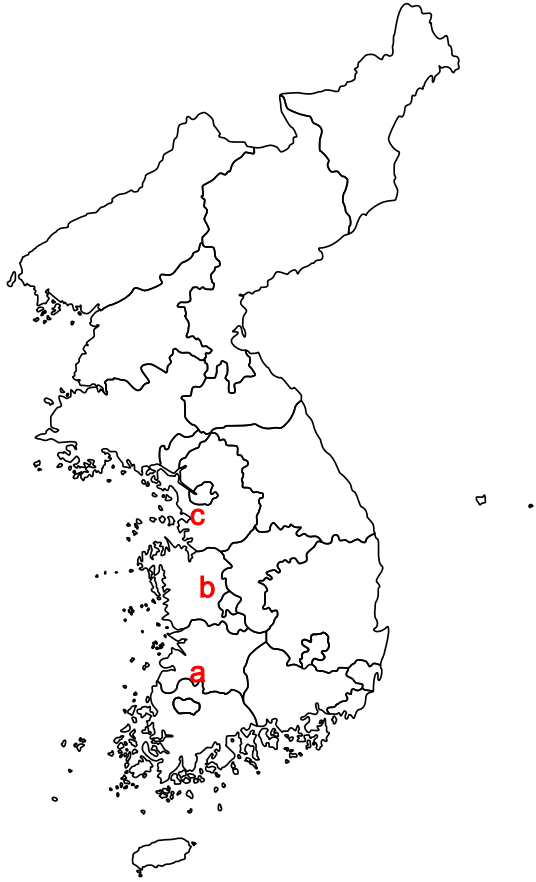

(B)

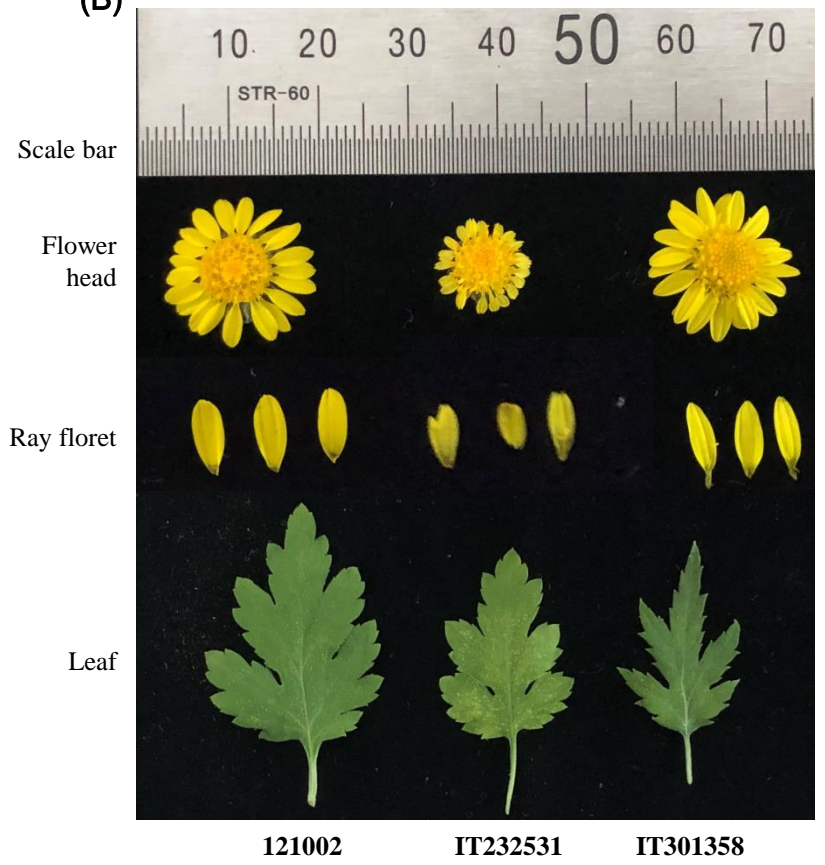

Supplement: FigureS1.pdf [file FigureS1.pdf]
