# Supplementary material for: A comparative analysis of the complete chloroplast genomes of three Chrysanthemum boreale strains
Source: PeerJ journal article supplement (doi:10.7717/peerj.9448), 2020-07-03

*trnK-UUU*

*trnK-UUU*

*matK*

121002 1935 bp  
IT232531 1937 bp  
IT301358 1937 bp

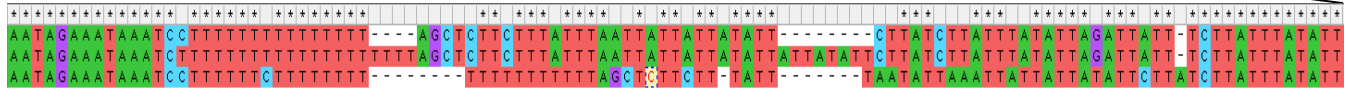

Supplement: FigureS3.pdf [file FigureS3.pdf]
