# Supplementary material for: A comparative analysis of the complete chloroplast genomes of three Chrysanthemum boreale strains
Source: PeerJ journal article supplement (doi:10.7717/peerj.9448), 2020-07-03
Supplement: FigureS5.pdf [file FigureS5.pdf]

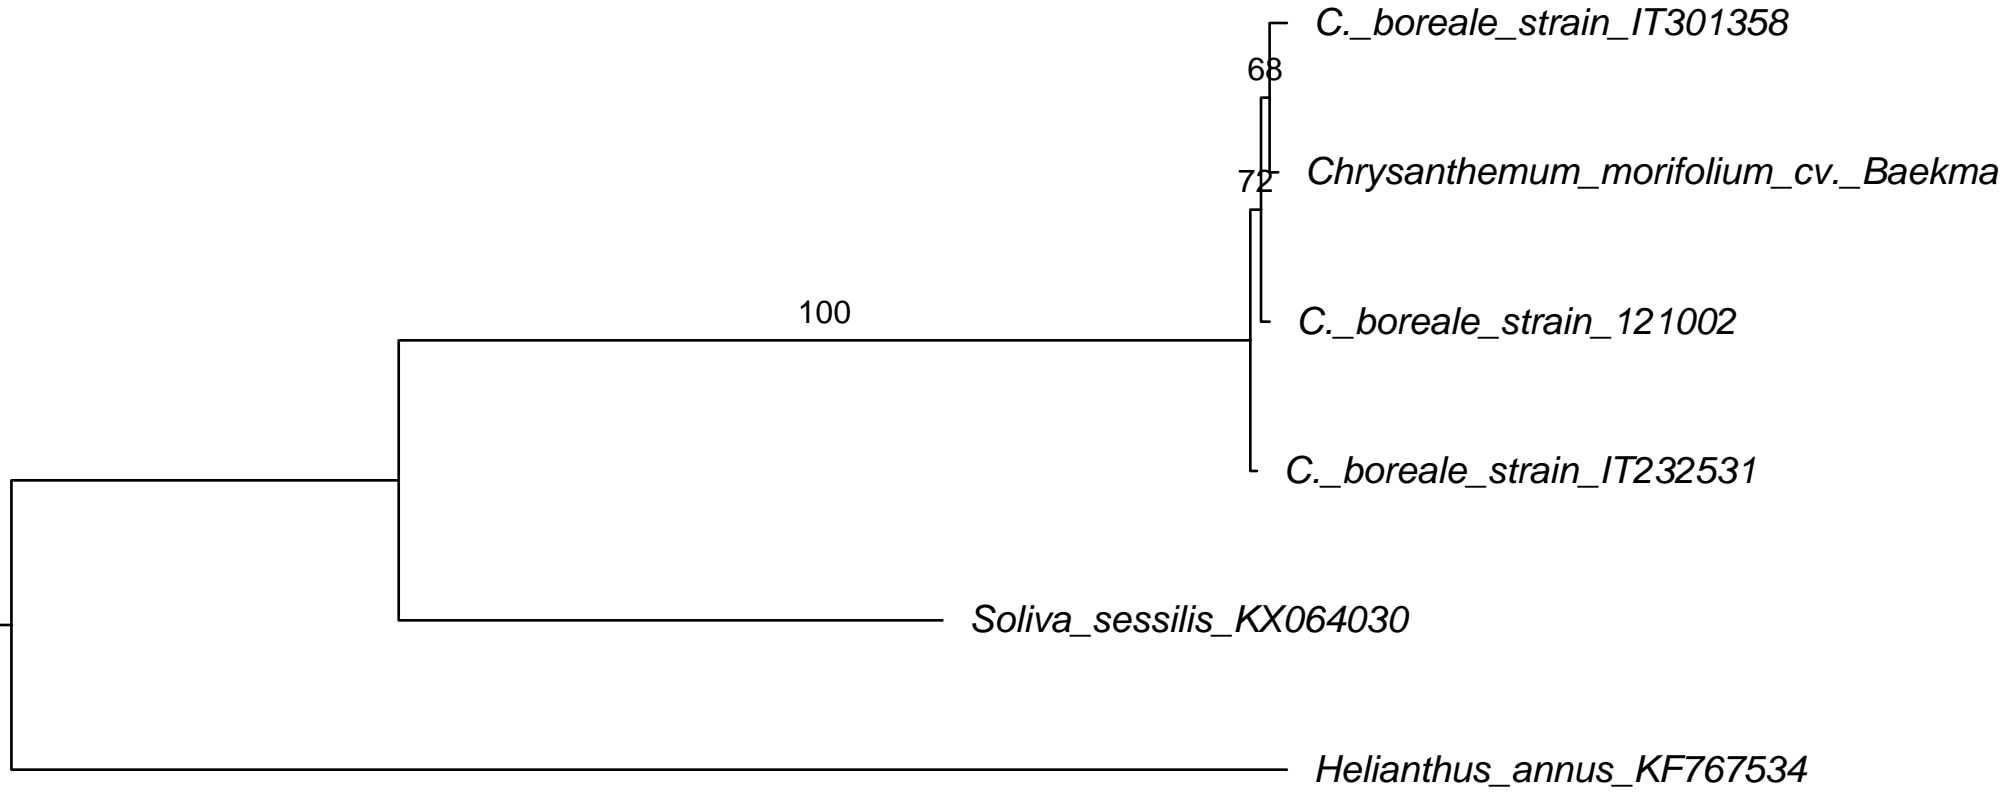

0.004
