# Supplementary material for: A comparative analysis of the complete chloroplast genomes of three Chrysanthemum boreale strains
Source: PubMed Central journal article supplement (PMC7337036; doi:10.7717/peerj.9448), 2020-07-03
Supplement: peerj-08-9448-s002.pdf [file peerj-08-9448-s002.pdf]

|                    |         |                                                                                                                       |
|--------------------|---------|-----------------------------------------------------------------------------------------------------------------------|
| IT232531           | 3055 bp | G A T A A A G A A A G A A T T A A T A A A A A A A A A C A A A A T A A A A T T G A C T T C A T T T C G C C T A T G A C |
| IT301358           | 3058 bp | G A T A A A G A A A G A A T T A A T A A A A A A A A A C A A A A T A A A A T T G A C T T C A T T T C G C C T A T G A C |
| Long-read, 121002  | 3055 bp | G A T A A A G A A A G A A T T A A T A A A A A A A A A A A A A - T A A A A T T G A C T T C A T T T C G C C T A T G A C |
| Short-read, 121002 | 3055 bp | G A T A A A G A A A G A A T T A A T A A A A A A A A A A A A A T A A A A T T G A C T T C A T T T C G C C T A T G A C   |
