# Supplementary material for: A comparative analysis of the complete chloroplast genomes of three Chrysanthemum boreale strains
Source: PubMed Central journal article supplement (PMC7337036; doi:10.7717/peerj.9448), 2020-07-03

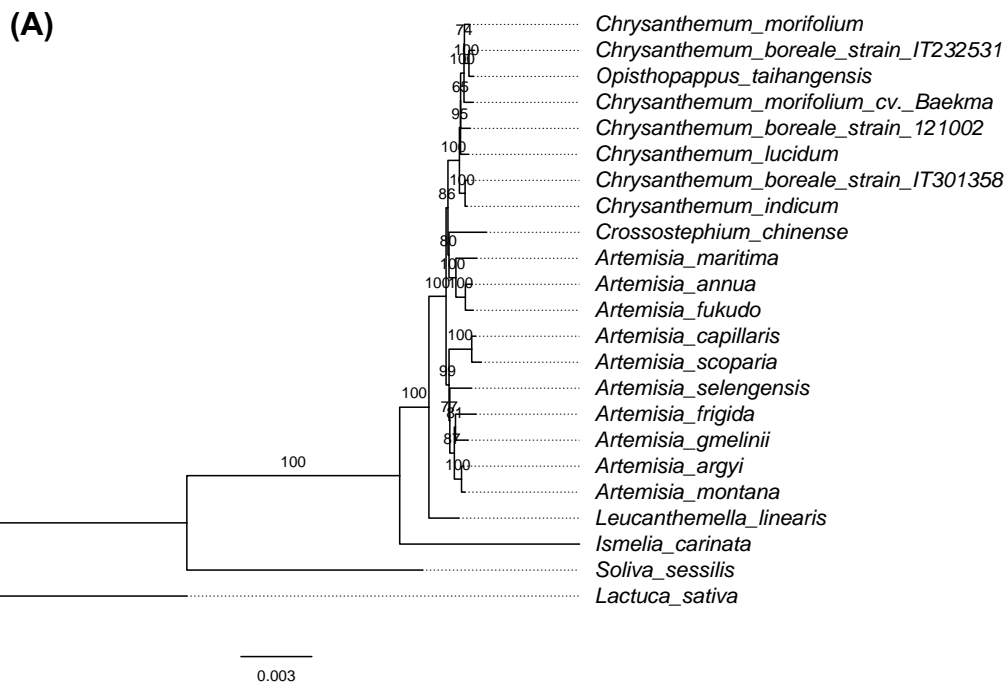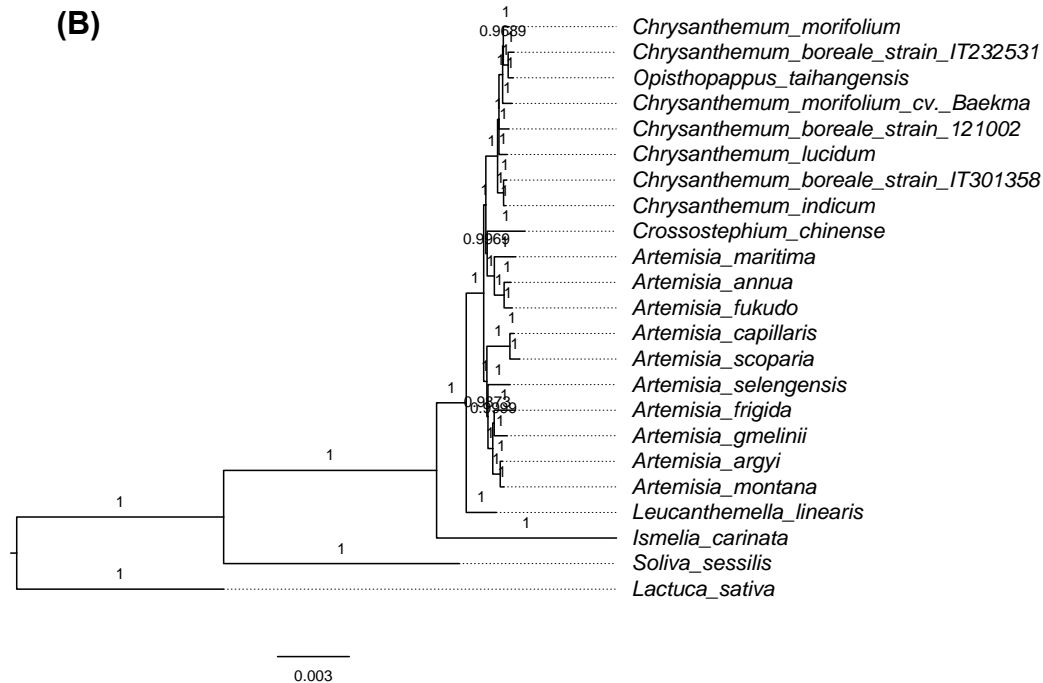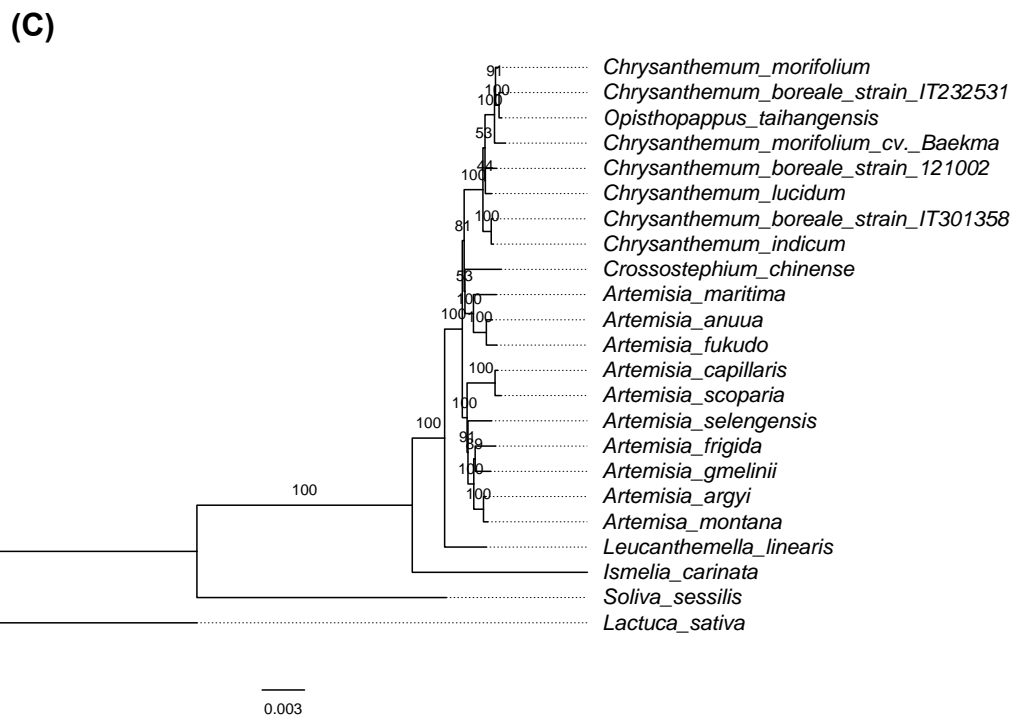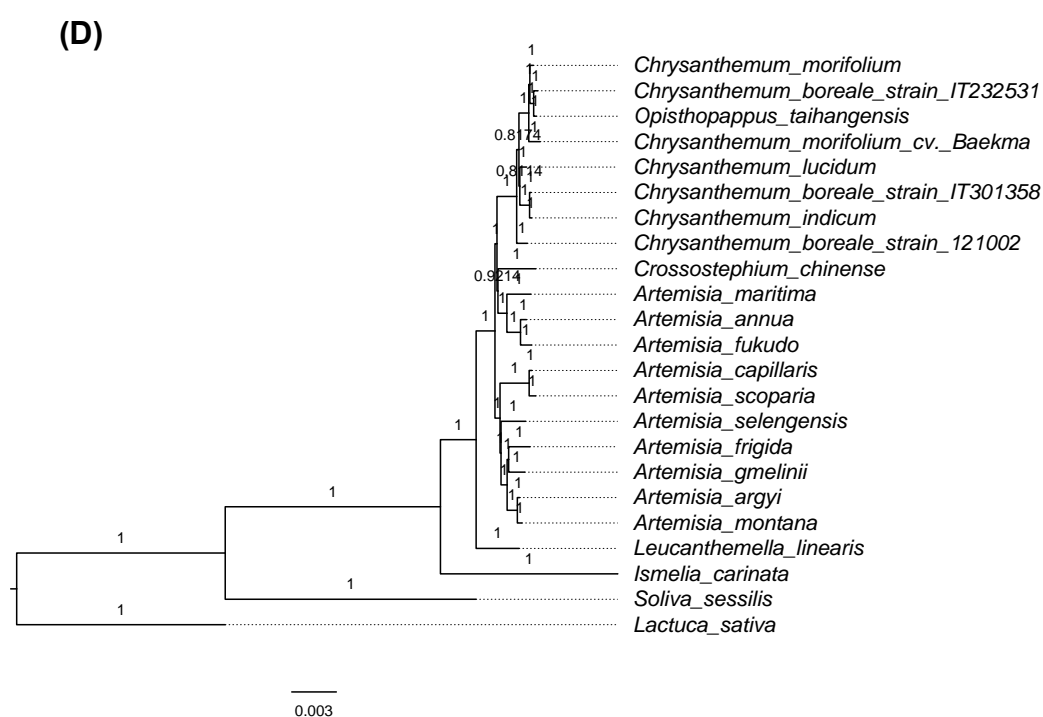

Supplement: peerj-08-9448-s004.pdf [file peerj-08-9448-s004.pdf]
