# Supplementary material for: A comparative analysis of the complete chloroplast genomes of three Chrysanthemum boreale strains
Source: PeerJ. 2020 Jul 3;8:e9448. doi: 10.7717/peerj.9448 (PMC7337036; doi:10.7717/peerj.9448)
Supplement: Supplemental Information 6 [file peerj-08-9448-s006.xlsx]

## Sheet: Table S1
Table S1. List of chloroplast genomes used for phylogenetic analysis in this study.
Species	GenBank ID
Artemisia annua	NC_034683.1
Artemisia argyi	NC_030785.1
Artemisia capillaris	NC_031400.1
Artimisia frigida	NC_020607.1
Artemisia fukudo	NC_044156.1
Artemisia gmelinii	NC_031399.1
Artemisia maritima	NC_045093.1
Artemisia montana	NC_025910.1
Artemisia scoparia	NC_045286.1
Artemisia selengensis	NC_039647.1
Chrysanthemum boreale strain 121002	MG913594
Chrysanthemum boreale strain IT232531	MN909052
Chrysanthemum boreale strain IT301358	MN913565
Chrysanthemum indicum	NC_020320.1
Chrysanthemum lucidum	NC_040920.1
Chrysanthemum morifolium	NC_020092.1
Chrysanthemum morifolium cv. Baekma	MK986830
Crossostephium chinense	NC_042725.1
Ismelia carinata	NC_040110.1
Leucanthemella linearis	NC_043835.1
Opisthopappus taihangensis	NC_042787.1
Soliva sessilis	NC_034851.1
Lactuca sativa	NC_007578.1
