# Supplementary material for: A comparative analysis of the complete chloroplast genomes of three Chrysanthemum boreale strains
Source: PeerJ. 2020 Jul 3;8:e9448. doi: 10.7717/peerj.9448 (PMC7337036; doi:10.7717/peerj.9448)
Supplement: Supplemental Information 7 [file peerj-08-9448-s007.xlsx]

## Sheet: Sheet1
Table S2. The best-fit models for phylogenetic analyses of different chloroplast datasets.
	Maximum likelihood (ModelFinder)	Bayesian inference (ModelTest-NG)
Complete cp genome	K3Pu+F+I+G4	TPM1uf+I+G
77 shared genes	GTR+F+I+G4	GTR+I+G
