# Supplementary material for: A comparative analysis of the complete chloroplast genomes of three Chrysanthemum boreale strains
Source: PeerJ. 2020 Jul 3;8:e9448. doi: 10.7717/peerj.9448 (PMC7337036; doi:10.7717/peerj.9448)
Supplement: Supplemental Information 10 [file peerj-08-9448-s010.xlsx]

## Sheet: Table S4
Table S5. Distribution of SSRs in the chlroplast genome of C. boreale.
Strains	No.	SSR	size	start	end	Location	Position	Region
C. boreale strain 121002	1	A	10	1675	1684	IGS	psbA_trnK-UUU	LSC
	2			4493	4502	IGS	trnK-UUU_rps16	LSC
	3			13340	13349	CDS	rpoB	LSC
	4			17961	17970	CDS	rpoC1	LSC
	5			18387	18396	CDS	rpoC1	LSC
	6			23088	23097	IGS	rpoC2_rps2	LSC
	7			29781	29790	IGS	trnR-UCU_trnT-GGU	LSC
	8			59884	59893	IGS	ycf4_cemA	LSC
	9			106072	106081	IGS	rrn5_trnR-ACG	IRa
	10			121837	121846	IGS	trnL-UAG_rpl32	SSC
	11			127282	127291	IGS	trnN-GUU_trnR-ACG	IRb
	12			132652	132661	Intron	trnI-GAU	IRb
	13			150032	150041	Intron	rpl2	IRb
	14		11	35538	35548	IGS	psbZ_trnG-UCC	LSC
	15			123181	123191	IGS	rpl32_ndhF	SSC
	16		12	46302	46313	IGS	trnT-UGU_trnL-UAA	LSC
	17			67173	67184	IGS	rps18_rpl20	LSC
	18		13	110291	110303	IGS	ycf1	SSC
	19		16	41605	41633	IGS	psaA_ycf3	LSC
	20	T	10	24938	24947	IGS	aptI_atpH	LSC
	21			26031	26040	IGS	atpI_atpH	LSC
	22			43648	43657	Intron	ycf3	LSC
	23			56617	56626	IGS	rbcL_accD	LSC
	24			76784	76793	CDS	rpoA	LSC
	25			82889	82898	IGS	rps19_rpl2	IRa
	26			101169	101178	Intron	trnI-GAU	IRa
	27			106539	106548	IGS	trnR-ACG_trnN-GUU	IRa
	28			127749	127758	IGS	trnR-ACG_rrn5	IRb
	29		11	34672	34682	IGS	psbC_trnS-UGA	LSC
	30			41605	41633	IGS	psaA_ycf3	LSC
	31			69275	69285	Intron	clpP	LSC
	32		12	29563	29574	IGS	atpA_trnR-UCU	LSC
	33			62070	62081	IGS	petA_psbJ	LSC
	34			109826	109837	CDS	ycf1	SSC
	35		14	54390	54403	IGS	atpB_rbcL	LSC
	36		15	1950	1964	Intron	trnK-UUU	LSC
	37			79202	79216	IGS	rps8_rpl14	LSC
	38		16	79706	79721	IGS	rpl14_rpl16	LSC
	39		18	12647	12664	IGS	trnE-UUC_rpoB	LSC
	40		23	27958	27980	IGS	atpF_atpA	LSC
	41	ATA	12	5655	5666	Intron	rps16	LSC
	42	ATT	12	60841	60852	IGS	cemA_petA	LSC
	43		27	64153	64179	IGS	psbE_petL	LSC
	44	TTC	12	34483	34494	CDS	psbC	LSC
	45	TAT	27	64153	64179	IGS	psbE_petL	LSC
	46	TTTC	16	80984	80999	IGS	rpl16_rps3	LSC
	47	AATTT	15	121616	121630	IGS	ccsA_trnL-UAG	SSC
C. boreale strain IT232531	1	A	10	4507	4516	IGS	trnK-UUU_rps16	LSC
	2			13381	13390	CDS	rpoB	LSC
	3			18002	18011	CDS	rpoC1	LSC
	4			18428	18437	CDS	rpoC1	LSC
	5			35544	35553	IGS	psbZ_trnG-UCC	LSC
	6			41799	41808	IGS	psaA_ycf3	LSC
	7			67242	67251	IGS	rps18_rpl20	LSC
	8			106129	106138	IGS	rrn5_trnR-ACG	IRa
	9			115421	115430	Intron	ndhA	SSC
	10			132744	132753	Intron	trnI-GAU	IRb
	11			151018	151027	IGS	rpl2_trnH-GUG	IRb
	12		11	29803	29813	IGS	trnR-uCU_trnS-CGA	LSC
	13			59925	59935	IGS	ycf4_cemA	LSC
	14		12	1675	1686	IGS	psbA_trnK-UUU	LSC
	15			121926	121937	IGS	trnL-UAG_rpl32	SSC
	16		16	41612	41627	IGS	psaA_ycf3	LSC
	17		17	46323	46339	IGS	trnT-UGU_trnL-UAA	LSC
	18	T	10	24974	24983	IGS	atpI_atpH	LSC
	19			26062	26071	IGS	atpI_atpH	LSC
	20			50243	50252	IGS	ndhC_trnV-UAC	LSC
	21			54439	54448	IGS	atpB_rbcL	LSC
	22			56662	56671	IGS	rbcL_accD	LSC
	23			76857	76866	CDS	rpoA	LSC
	24			79777	79786	IGS	rpl14_rpl16	LSC
	25			82952	82961	IGS	rps19_rpl2	IRa
	26			101226	101235	IGS	rrn16_trnI-GAU	IRa
	27			127841	127850	IGS	trnR-ACG_rrn5	IRb
	28		11	29586	29596	IGS	atpA_trnR-UCU	LSC
	29			122978	122988	IGS	rpl32_ndhF	SSC
	30		12	43643	43654	Intron	ycf3	LSC
	31			69342	69353	Intron	clpP	LSC
	32			109883	109894	CDS	ycf1	SSC
	33		13	12684	12696	IGS	trnE-UUC_rpoB	LSC
	34			79275	79287	IGS	rps8_rpl14	LSC
	35		15	27989	28003	IGS	atpF_atpA	LSC
	36		20	1951	1970	IGS	trnK-UUU	LSC
	37	C	13	5448	5460	Intron	rps16	LSC
	38	ATA	18	5674	5691	Intron	rps16	LSC
	39	TTC	12	34491	34502	CDS	psbC	LSC
	40	ATT	12	60883	60894	IGS	cemA_petA	LSC
	41	TTTC	16	81051	81066	IGS	rpl16_rps3	LSC
	42	TATTA	15	64187	64201	IGS	psbE_petL	LSC
	43	AATTT	15	121705	121719	IGS	ccsA_trnL-UAG	SSC
C. boreale strain IT301358	1	A	10	4492	4501	IGS	trnK-UUU_rps16	LSC
	2			13350	13359	CDS	rpoB	LSC
	3			17971	17980	CDS	rpoC1	LSC
	4			18397	18406	CDS	rpoC1	LSC
	5			35520	35529	IGS	psbZ_trnG-UCC	LSC
	6			67158	67167	IGS	rps18_rpl20	LSC
	7			72950	72959	CDS_IGS	psbT_psbN	LSC
	8			106043	106052	IGS	rrn5_trnR-ACG	IRa
	9			132650	132659	Intron	trnI-GAU	IRb
	10			150930	150939	IGS	rpl2_trnH-GUG	IRb
	11		11	11224	11234	IGS	psbM_trnD-GUC	LSC
	12			23098	23108	IGS	rpoC2_rps2	LSC
	13			29777	29787	IGS	trnR-UCU_trnS-CGA	LSC
	14		12	1675	1686	IGS	psbA_trnK-UUU	LSC
	15			59930	59941	IGS	ycf4_cemA	LSC
	16			123178	123189	IGS	rpl32_ndhF	SSC
	17		15	121837	121851	IGS	trnL-UAG_rpl32	SSC
	18		16	41597	41612	IGS	psaA_ycf3	LSC
	19		17	46298	46314	IGS	trnT-UGU_trnL-UAA	LSC
	20	T	10	10667	10676	IGS	psbM_trnD-GUC	LSC
	21			26036	26045	IGS	atpI_atpH	LSC
	22			30986	30995	IGS	trnT-GGU_psbD	LSC
	23			34655	34664	IGS	psbC_trnS-UGA	LSC
	24			43629	43638	CDS	ycf3	LSC
	25			56663	56672	IGS	rbcL_accD	LSC
	26			64345	64354	IGS	psbE_petL	LSC
	27			76773	76782	CDS	rpoA	LSC
	28			82860	82869	IGS	rps19_rpl2	IRa
	29			101140	101149	Intron	trnI-GAU	IRa
	30			127747	127756	IGS	trnR-ACG_rrn5	IRb
	31		12	50211	50222	IGS	ndhC_trnV-UAC	LSC
	32			62118	62129	IGS	petA_psbJ	LSC
	33			79698	79709	IGS	rpl14_rpl16	LSC
	34			109799	109810	CDS	ycf1	SSC
	35		13	27963	27975	IGS	atpF_atpA	LSC
	36			29558	29570	IGS	atpA_trnR-UCU	LSC
	37		15	54435	54449	IGS	atpB_rbcL	LSC
	38		16	69260	69275	Intron	clpP	LSC
	39		17	12658	12674	IGS	trnE-UUC_rpoB	LSC
	40		18	79191	79208	IGS	rps8_rpl14	LSC
	41		19	1959	1977	Intron	trnK-UUU	LSC
	42	C	14	5417	5430	Intron	rps16	LSC
	43	ATA	12	5644	5655	Intron	rps16	LSC
	44	ATT	12	60889	60900	IGS	cemA_petA	LSC
	45	TTA	15	64138	64152	IGS	psbE_petL	LSC
	46	TTC	12	34466	34477	CDS	psbC	LSC
	47	TAA	15	58612	58626	IGS	accD_psaI	LSC
	48	TTTC	16	80974	80989	IGS	rpl16_rps3	LSC
	49	AATTT	15	121618	121632	IGS	ccsA_trnL-UAG	SSC
	50	TATAT	15	50357	50371	IGS	ndhC_trnV-UAC	LSC
