# Supplementary material for: A comparative analysis of the complete chloroplast genomes of three Chrysanthemum boreale strains
Source: PeerJ. 2020 Jul 3;8:e9448. doi: 10.7717/peerj.9448 (PMC7337036; doi:10.7717/peerj.9448)
Supplement: Supplemental Information 11 [file peerj-08-9448-s011.xlsx]

## Sheet: Table S5
Table S6. Distribution of long dispersed repeats in the chloroplast genome of C. boreale.
Strains	No	Repeat class	Repeat size (bp)	Position of the first repeat					Position of the second repeat
				Start	End	Region	Locus	Location	Start	End	Region	Locus	Location
C. boreale strain 121002	1	F	30	27957	27986	LSC	atpF_atpA	IGS	27958	27987	LSC	atpF_atpA	IGS
	2	F	30	56214	56243	LSC	rbcL_accD	CDS, IGS	56238	56267	LSC	rbcL_accD	IGS
	3	F	30	66274	66303	LSC	psaJ_rpl33	IGS	97981	98010	IRa	ycf15_trnV-GAC	IGS
	4	F	30	105711	105740	IRa	rrn4.5_rrn5	IGS	105743	105772	IRa	rrn4.5_rrn5	IGS
	5	F	31	27945	27975	LSC	atpF_atpA	IGS	27949	27979	LSC	atpF_atpA	IGS
	6	F	32	8444	8475	LSC	psbI_trnS-GCU	IGS, CDS	34808	34839	LSC	psbC_trnS-UGA	IGS, CDS
	7	F	32	30807	30838	LSC	trnR-UCU_trnT-GGU	IGS	30828	30859	LSC	trnR-UCU_trnT-GGU	IGS
	8	F	33	5023	5055	LSC	trnK-UUU_rps16	IGS	5038	5070	LSC	trnK-UUU_rps16	IGS
	9	F	35	43047	43081	LSC	ycf3	Intron	93769	93803	IRa	ndhB	Intron
	10	F	41	38016	38056	LSC	psaB	CDS	40240	40280	LSC	psaA	CDS
	11	F	41	43042	43082	LSC	ycf3	Intron	96818	96858	IRa	rps12_ycf15	IGS
	12	F	60	90044	90103	IRa	ycf2	CDS	90062	90121	IRa	ycf2	CDS
	13	R	30	27949	27978	LSC	atpF_atpA	IGS	79194	79223	LSC	rps8_rpl14	IGS
	14	R	30	64143	64172	LSC	psbE_petL	IGS	64143	64172	LSC	psbE_petL	IGS
	15	P	30	8446	8475	LSC	psbI_trnS-GCU	IGS, CDS	44731	44760	LSC	trnS-GGA_rps4	CDS, IGS
	16	P	30	34810	34839	LSC	psbC_trnS-UGA	IGS, CDS	44731	44760	LSC	trnS-GGA_rps4	CDS, IGS
	17	P	39	43044	43082	LSC	ycf3	Intron	115699	115737	SSC	ndhA	Intron
	18	P	39	96820	96858	IRa	rps12_ycf15	IGS	115699	115737	SSC	ndhA	Intron
	19	P	48	72992	73039	LSC	psbT_psbN	IGS, CDS	72992	73039	LSC	psbT_psbN	IGS, CDS
C. boreale strain IT232531	1	F	30	56259	56288	LSC	rbcL_accD	CDS, IGS	56283	56312	LSC	rbcL_accD	IGS
	2	F	30	66343	66372	LSC	psaJ_rpl33	IGS	98038	98067	IRa	ycf15_trnV-GAC	IGS
	3	F	30	105768	105797	IRa	rrn4.5_rrn5	IGS	105800	105829	IRa	rrn4.5_rrn5	IGS
	4	F	31	1980	2010	LSC	trnK-UUU_rps16	IGS	64217	64247	LSC	psbE_petL	IGS
	5	F	31	82629	82659	LSC	rpl22_rps19	IGS	115634	115664	SSC	ndhA	Intron
	6	F	32	8470	8501	LSC	psbI_trnS-GCU	IGS, CDS	34814	34845	LSC	psbC_trnS-UGA	IGS, CDS
	7	F	33	64169	64201	LSC	psbE_petL	IGS	64211	64243	LSC	psbE_petL	IGS
	8	F	35	43042	43076	LSC	ycf3	Intron	93832	93866	IRa	ndhB	Intron
	9	F	41	38021	38061	LSC	psaB	CDS	40245	40285	LSC	psaA	CDS
	10	F	41	43037	43077	LSC	ycf3	Intron	96881	96921	IRa	rps12_ycf15	IGS
	11	F	60	90107	90166	IRa	ycf2	CDS	90125	90184	IRa	ycf2	CDS
	12	P	30	8472	8501	LSC	psbI_trnS-GCU	IGS, CDS	44727	44756	LSC	trnS-GGA_rps4	CDS, IGS
	13	P	30	29576	29605	LSC	atpA_trnR-UCU	IGS	29792	29821	LSC	trnR-UCU_trnT-GGU	IGS
	14	P	30	34816	34845	LSC	psbC_trnS-UGA	IGS, CDS	44727	44756	LSC	trnS-GGA_rps4	CDS, IGS
	15	P	39	43039	43077	LSC	ycf3	Intron	115790	115828	SSC	ndhA	Intron
	16	P	39	96883	96921	IRa	rps12_ycf15	IGS	115790	115828	SSC	ndhA	Intron
	17	P	41	118903	118943	SSC	psaC_ndhD	IGS	118903	118943	SSC	psaC_ndhD	IGS
	18	P	48	73060	73107	LSC	psbT_psbN	IGS, CDS	73060	73107	LSC	psbT_psbN	IGS, CDS
C. boreale strain IT301358	1	F	30	56260	56289	LSC	rbcL_accD	CDS, IGS	56284	56313	LSC	rbcL_accD	IGS
	2	F	30	66263	66292	LSC	psaJ_rpl33	IGS	97952	97981	IRa	ycf15_trnV-GAC	IGS
	3	F	30	105682	105711	IRa	rrn4.5_rrn5	IGS	105714	105743	IRa	rrn4.5_rrn5	IGS
	4	F	31	50234	50264	LSC	ndhC_trnV-UAC	IGS	50260	50290	LSC	ndhC_trnV-UAC	IGS
	5	F	32	8433	8464	LSC	psbI_trnS-GCU	IGS, CDS	34790	34821	LSC	psbC_trnS-UGA	IGS, CDS
	6	F	35	43028	43062	LSC	ycf3	Intron	93740	93774	IRa	ndhB	Intron
	7	F	41	37997	38037	LSC	psaB	CDS	40221	40261	LSC	psaA	CDS
	8	F	41	43023	43063	LSC	ycf3	Intron	96789	96829	IRa	rps12_ycf15	IGS
	9	F	60	90015	90074	IRa	ycf2	CDS	90033	90092	IRa	ycf2	CDS
	10	R	30	29557	29586	LSC	atpA_trnR-UCU	IGS	69242	69271	LSC	cplP	Intron
	11	C	31	41587	41617	LSC	psaA_ycf3	IGS	69250	69280	LSC	cplP	Intron
	12	P	30	8435	8464	LSC	psbI_trnS-GCU	IGS, CDS	44705	44734	LSC	trnS-GGA	CDS
	13	P	30	34792	34821	LSC	psbC_trnS-UGA	IGS, CDS	44705	44734	LSC	trnS-GGA	CDS
	14	P	39	43025	43063	LSC	ycf3	Intron	115700	115738	SSC	ndhA	Intron
	15	P	39	96791	96829	IRa	rps12_ycf15	IGS	115700	115738	SSC	ndhA	Intron
	16	P	48	72981	73028	LSC	psbT_psbN	IGS, CDS	72981	73028	LSC	psbT_psbN	IGS, CDS
